# Supplementary material for: Coprostanol as a Population Biomarker for SARS-CoV-2 Wastewater Surveillance Studies
Source: MDPI journal article supplement (doi:10.3390/w14020225), 2022-01-13
Supplement: s1 [file s1]

Archive with 1 entries (1 files):
- water-1520404-supplementary.pdf
