# Supplementary material for: Coprostanol as a Population Biomarker for SARS-CoV-2 Wastewater Surveillance Studies
Source: MDPI journal article supplement (doi:10.3390/w14020225), 2022-01-13
Supplement: s1 [file s1 › water-1520404-supplementary.pdf]

# Coprostanol as a Population Biomarker for SARS-CoV-2 Wastewater Surveillance Studies

Liam J. Reynolds <sup>1,†</sup>, Laura Sala-Comorera <sup>1,†</sup>, Mohd Faheem Khan <sup>1</sup>, Niamh A. Martin <sup>1</sup>, Megan Whitty <sup>1</sup>, Jayne H. Stephens <sup>1</sup>, Tristan M. Nolan <sup>1</sup>, Eadaoin Joyce <sup>2</sup>, Nicola F. Fletcher <sup>3</sup>, Cormac D. Murphy <sup>1</sup> and Wim G. Meijer <sup>1,\*</sup>

<sup>1</sup> UCD School of Biomolecular and Biomedical Science, UCD Earth Institute and UCD Conway Institute, University College Dublin, D04 V1W8 Dublin, Ireland; liam.reynolds@ucd.ie (L.J.R.); laura.sala-comorera@ucd.ie (L.S.-C.); mohd.khan@ucd.ie (M.F.K.); niamh.martin1@ucd.ie (N.A.M.); Megan.whitty@ucd.ie (M.W.); jayne.stephens@ucdconnect.ie (J.H.S.); Tristan.nolan@ucdconnect.ie (T.M.N.); cormac.d.murphy@ucd.ie (C.D.M.)

<sup>2</sup> Irish Water, Colvill House, 24-26 Talbot Street, D01 NP86 Dublin, Ireland; ejoyce@water.ie

<sup>3</sup> UCD School of Veterinary Medicine, UCD Conway Institute, University College Dublin, D04 V1W8 Dublin, Ireland; nicola.fletcher@ucd.ie

† These authors contributed equally to this work.

\* Correspondence: wim.meijer@ucd.ie; Tel.: +353-17-162-778

## Supporting Information

**Table S1.** Table detailing the recovery efficiency of SARS-CoV-2 from heat inactivated SARS-CoV-2 spiked sewage samples (previously shown to be SARS-CoV-2 negative) concentrated using Centricon concentration.

| Sample                           | Recovery of SARS-CoV-2 following Centricon Concentration |
|----------------------------------|----------------------------------------------------------|
| 50 ml SARS-CoV-2 Spiked Sewage A | 50.2 %                                                   |
| 50 ml SARS-CoV-2 Spiked Sewage B | 91.6 %                                                   |
| 50 ml SARS-CoV-2 Spiked Sewage C | 94.7 %                                                   |

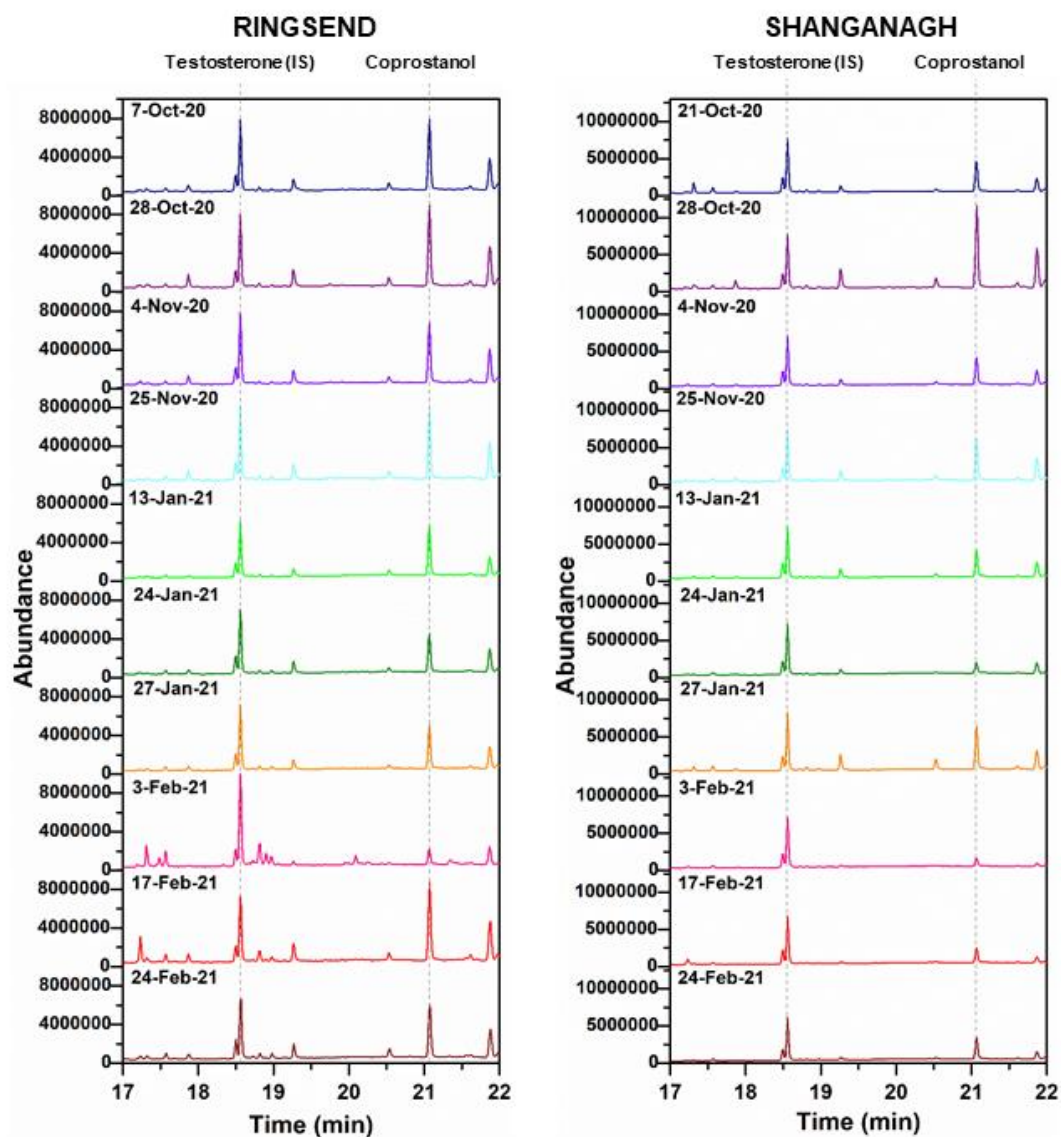

**Figure S1.** Chromatograms depicting coprostanol peaks at approximately 21 min in Ringsend (**left**) and Shanganagh (**right**) composite influent samples. An internal testosterone standard was included in each gas chromatography run and the peaks are seen at approximately 18.5 minutes.

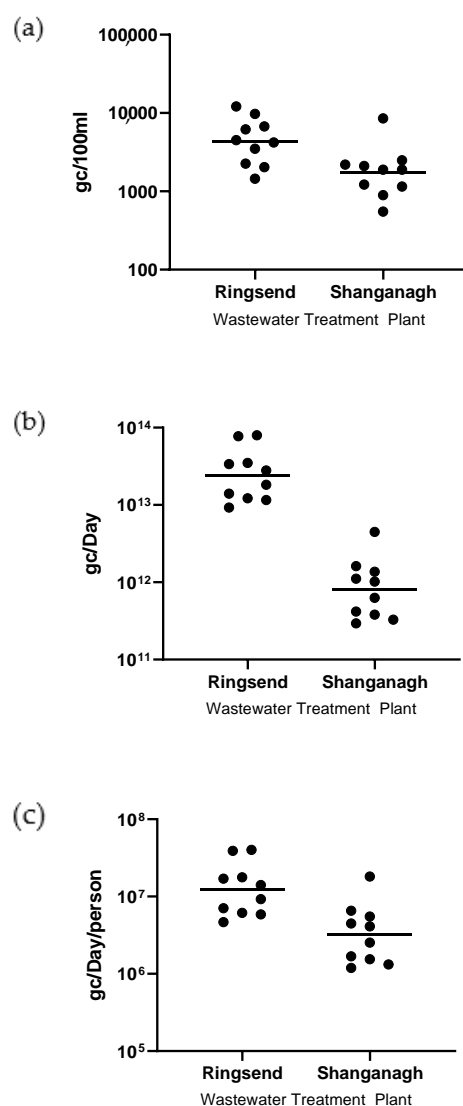

**Figure S2.** (a) Dot plots showing the concentration of the SARS-CoV-2 N1 marker in the composite influent samples collected from Ringsend and Shanganagh wastewater treatment plants during this study. (b) Dot plots showing the daily loadings of SARS-CoV-2 N1 marker in both the Ringsend and Shanganagh wastewater treatment plants on the days of sample collection. (c) Dot plots showing the distribution of daily loadings per person of the SARS-CoV-2 N1 gene from both wastewater treatment plants over the course of this study. In all graphs, the horizontal line represents the geometric mean of the dataset.
